# Supplementary material for: Synthesis of Apolipoprotein a-i in Human Macrophages Enhances Their Migratory Activity
Source: Research Square preprint supplement (doi:10.21203/rs.3.rs-7904915/v1), 2025-10-31
Supplement: Supplementary file 1 [file fd8054970dc27a4e2f5d8af6.pdf]

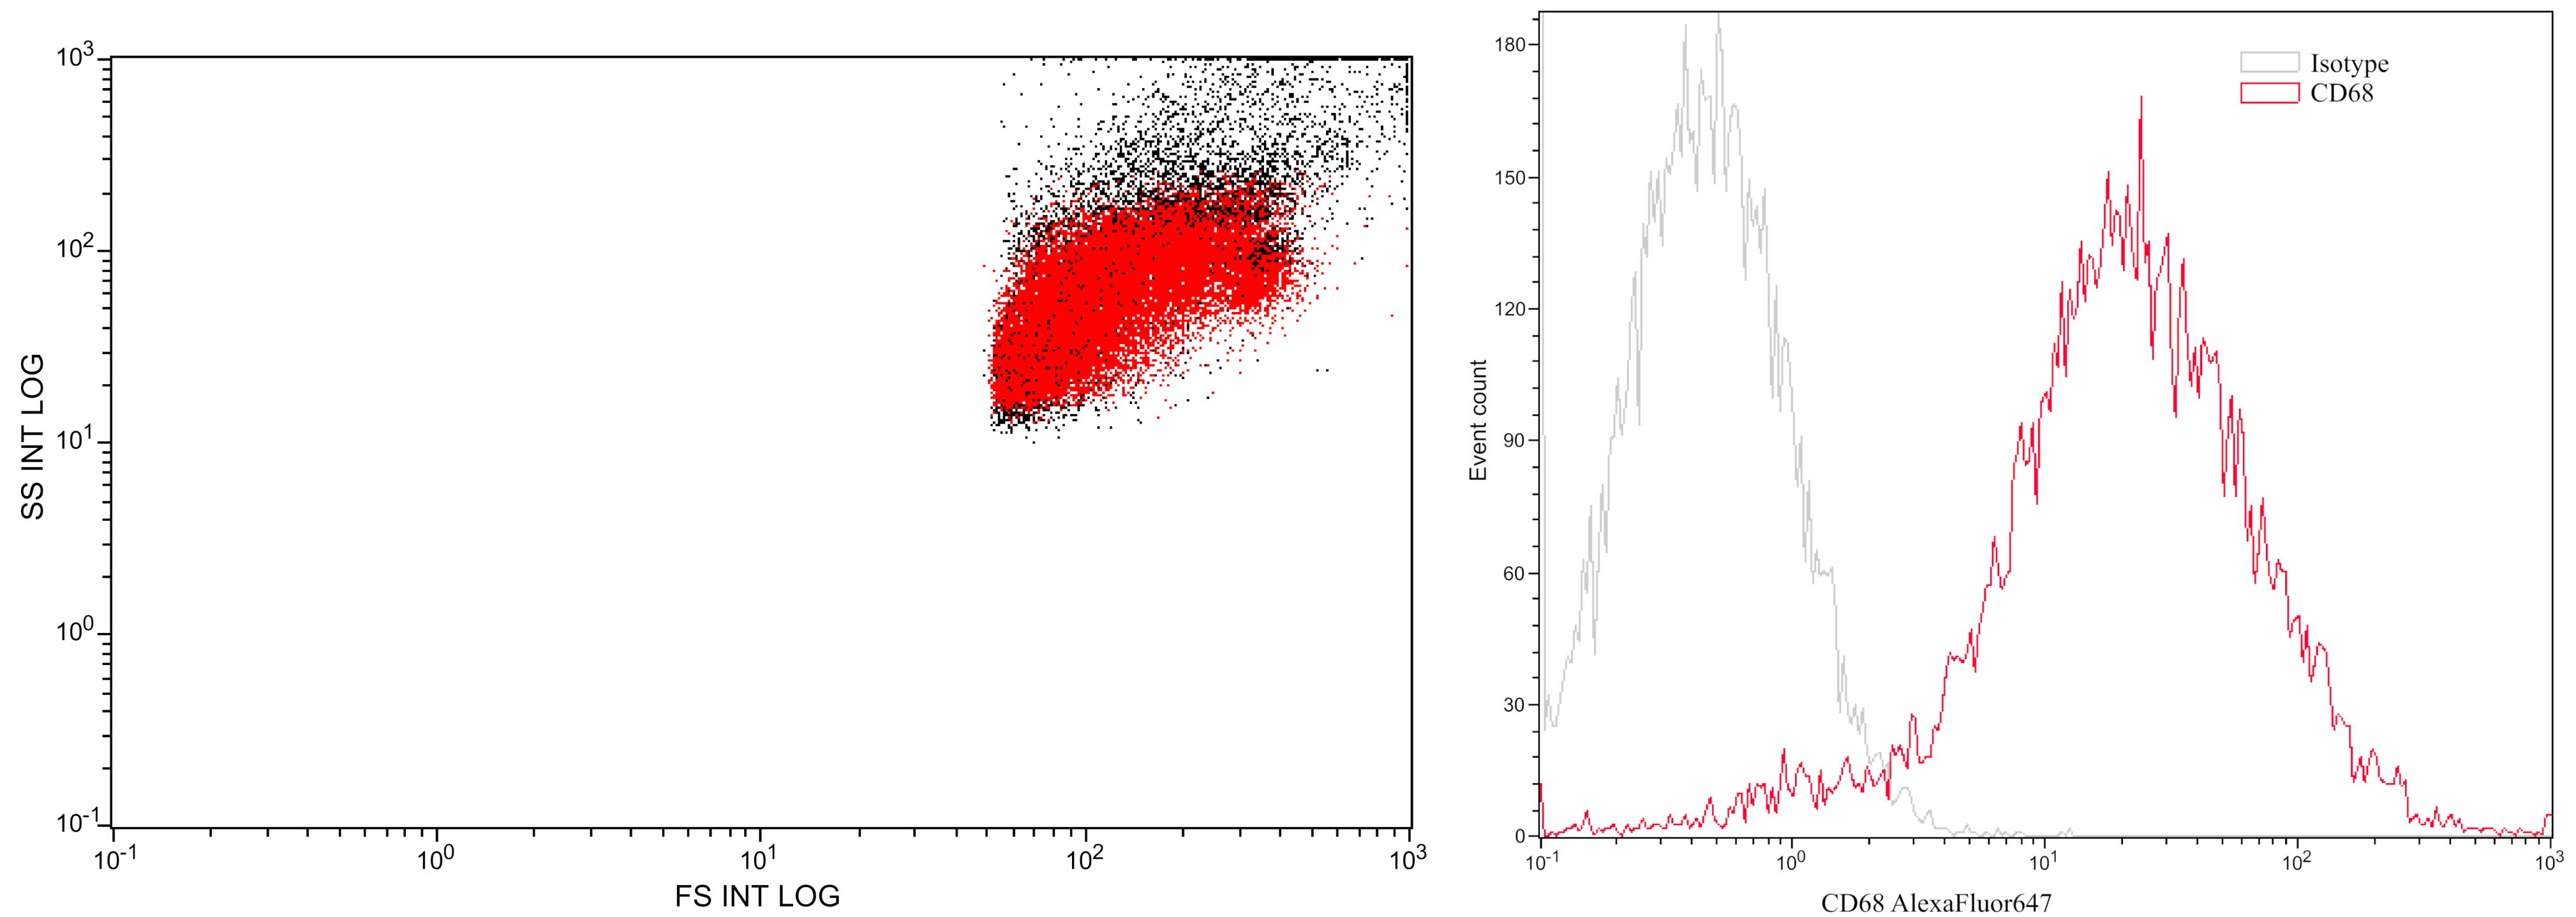

**Figure S1. PBMC macrophages differentiated during 5 days were immunophenotyped by flow cytometry analysis:** A) it was shown the characteristics cells based on their size and granularity: forward scatter intensity logarithmic scale (FS INT LOG) and side scatter intensity (SS INT LOG), in which one population cells stained with antibodies against CD68 is distinguished. Black population corresponds of all events (cells) in the sample, red population corresponds to the cells stained by antibodies against CD68. B) Grey line (isotype Alexa647) corresponds to the isotype control (the cells were stained with the isotypic mouse antibodies IgG1 labeled by Alexa Fluor647); red line (CD68) corresponds to the distributions of cells stained with CD68 antibodies labeled Alexa647.
